# Supplementary material for: The Utility of Urinary Titin to Diagnose and Predict the Prognosis of Acute Myocardial Infarction
Source: MDPI journal article supplement (doi:10.3390/ijms25010573), 2024-01-01
Supplement: s1 [file s1]

**Supplementary Table S1.** Association between urinary titin and parameters in non-AMI patients and AMI patients. In AMI patient group, urinary titin was correlated with CK-MB and hsTnI. However, non-AMI patient group has no correlation with them.

Wilcoxon rank sum test

|     | Non-AMI(n=32)                |         | AMI(n=51)                    |         |
|-----|------------------------------|---------|------------------------------|---------|
|     | Urinary Titin<br>(pmol/mgCr) | p-value | Urinary Titin<br>(pmol/mgCr) | p-value |
| Sex |                              | 0.044   |                              | 0.347   |
|     | Male 6.33 (4.07-13.79)       |         | 6.31 (3.28-13.46)            |         |
|     | Female 3.68 (2.80-5.89)      |         | 9.28 (4.38-17.19)            |         |

Spearman's rank correlation

|                          | Non-AMI(n=32) |         | AMI(n=51) |         |
|--------------------------|---------------|---------|-----------|---------|
|                          | rs            | p-value | rs        | p-value |
| Age                      | 0.092         | 0.617   | 0.262     | 0.063   |
| BMI                      | -0.019        | 0.920   | 0.146     | 0.312   |
| Systolic blood pressure  | -0.348        | 0.059   | 0.221     | 0.119   |
| Diastolic blood pressure | -0.206        | 0.274   | 0.052     | 0.718   |
| SpO <sub>2</sub>         | -0.302        | 0.099   | -0.129    | 0.368   |
| CK                       | 0.510         | 0.003   | 0.599     | <0.001  |
| CK-MB                    | 0.213         | 0.243   | 0.314     | 0.025   |
| Serum hs-Troponin I      | 0.201         | 0.287   | 0.525     | <0.001  |
| BUN                      | 0.177         | 0.333   | 0.381     | 0.006   |
| BNP                      | 0.277         | 0.154   | 0.599     | <0.001  |
| eGFR                     | -0.165        | 0.367   | -0.217    | 0.127   |
